1 **Title:** Analysis of serum trace elements, macro-minerals, antioxidants,  
2 malondialdehyde and immunoglobulins in seborrheic dermatitis patients:  
3 A case-control investigation

4  
5 **Authors:**

6 Ishrat Jahan<sup>1^</sup> (ishrat.jahan91@yahoo.com)

7 Md. Rabiul Islam<sup>2^\*</sup> (robi.ayaan@gmail.com)

8 Md. Reazul Islam<sup>1^</sup> (reajuldu.islam@yahoo.com)

9 Rubaiya Ali<sup>3</sup> (ali.rubaiya@yahoo.com)

10 S. M. Matiur Rahman<sup>4</sup> (bdmatiur@yahoo.com)

11 Zabun Nahar<sup>2</sup> (zabunnahar@uap-bd.edu)

12 Abul Hasnat<sup>1#</sup> (ahasnat99@yahoo.com)

13 Md. Saiful Islam<sup>1</sup> (saifulpharmacy@yahoo.com)

14 <sup>^</sup> These authors contributed equally and the names are arranged by alphabetic order.

15 <sup>#</sup> Deceased.

16

17 **\*Corresponding author:**

18 **Md. Rabiul Islam, PhD**

19 Assistant Professor, Department of Pharmacy, University of Asia Pacific, 74/A, Green Road,

20 Dhaka - 1215, Bangladesh, Email: robi.ayaan@gmail.com; ORCID: 0000-0003-2820-3144

## 1 Abstract

2 **Background:** There are many theories about; the exact mechanism for the pathophysiology of  
3 seborrheic dermatitis (SD) remains unknown. Neuropsychiatric disorders, stress, weakened or  
4 irregular immune responses, fungal infections, etc. are thought to be associated with the  
5 development of SD. The present study aimed to determine the serum levels of trace elements  
6 (TEs), macro-minerals (MMs), antioxidant vitamins, malondialdehyde (MDA), and  
7 immunoglobulins in SD patients to explore their role in the disease progression.

8 **Methods:** This prospective case-control study recruited 75 SD patients and 76 healthy controls  
9 (HCs) matched by age and gender. Serum TEs and MMs were analyzed by the flame atomic  
10 absorption spectroscopy and graphite furnace atomic absorption spectrometry. RP-HPLC was  
11 used to determine the serum levels of vitamin A and E. Serum MDA levels were measured by  
12 UV spectrophotometry as a marker of lipid peroxidation, whereas the turbidimetric method was  
13 used to quantify the serum levels of immunoglobulins.

14 **Results:** We found significantly higher concentrations of serum copper, manganese, and iron,  
15 calcium, and magnesium in SD patients compared to HCs. Serum levels of vitamin E  
16 significantly decreased and serum levels of MDA significantly increased in SD patients. Besides,  
17 the lower concentrations of immunoglobulin A, G, and M were observed in SD patients when  
18 compared to HCs. The present study also found a positive correlation between serum Zn and Ca  
19 levels ( $r = 0.365$ ,  $p = 0.009$ ) in SD patients; whereas a negative relation was detected between  
20 serum Cu and Ca levels ( $r = -0.298$ ,  $p = 0.035$ ).

21 **Conclusions:** The present study suggests that increased levels of TEs, MMs, MDA, and  
22 decreased levels of immunoglobulins and vitamin E are strongly associated with the

1 pathophysiology of SD. Moreover, these alterations may provide a predictive tool for the  
2 assessment and management of SD patients.

3 **Keywords:** Seborrheic dermatitis, Trace elements, Macro-minerals, Antioxidants vitamins,  
4 MDA, Immunoglobulins

### 5 **Background**

6 Seborrheic dermatitis (SD) is one of the most common skin disorders and a large number of  
7 people suffer from this skin disease [1]. This chronic condition also termed as papulosquamous  
8 dermatosis since both scales and papules have been found notably. The affected skin becomes  
9 edematous, pinkish, and covered with yellow-brown scales and crusts [3]. Both infants and  
10 adults can be affected by SD [2]. An excess amount of sebum is produced from the scalp;  
11 sebaceous follicle-rich areas on the face and trunk are seen in SD patients. It is thought to be one  
12 of the most common skin manifestations in patients with human immunodeficiency virus (HIV)  
13 infection [4]. There is no data available on the exact incidence of SD in infants, but the disorder  
14 is common [5]. The prevalence of SD in adults is believed to be more common than psoriasis. In  
15 the USA, the prevalence of SD among the general population is at least 3-5% [6]. Men are  
16 affected more often than women in all age groups [7]. Approximately, 15-20% of the total  
17 population is suffering from dandruff, which is usual and thought to be the mildest form of SD  
18 [8]. In Bangladesh, the prevalence of SD is in a similar magnitude as in developed countries.  
19 Statistics show that 15.5 % of populations are suffering from skin diseases in Bangladesh [9].  
20 Several factors such as hormone levels, fungal infections, nutritional deficits, neurogenic factors  
21 may be responsible for the development of skin diseases [10]. An inadequate amount of work has  
22 been done to reveal the possible reasons for the development of SD. Further knowledge about  
23 SD is required for the design of new drug molecules against this skin disease.

1 Inorganic minerals and nutrients present in all body tissues are vital for the maintenance of  
2 normal body functions [11]. The importance of sodium, chloride, and calcium in SD has been  
3 well recognized for different biochemical processes and immunological functions [12, 13].  
4 Moreover, different trace element (TE) and macro-mineral (MM) such as copper (Cu), iron (Fe),  
5 manganese (Mn), zinc (Zn), calcium (Ca), magnesium (Mg) can induce cellular oxidative stress  
6 by various mechanisms [14]. According to the American Academy of Dermatology (AAD),  
7 three-dimensional structures of many proteins are important for healthy skin. Some TEs and  
8 MMs have a function to maintain this three-dimensional structure of proteins [15]. **Elevated**  
9 **levels of these TEs and MMs are considered to be responsible for developing various skin**  
10 **diseases [16]. Altered serum Zn levels were observed in SD patients compared to control**  
11 **subjects [17]. Therefore, changes in serum TEs and MMs levels may influence the**  
12 **pathophysiology and development of SD.**

13 Human skin gets constant exposure to oxidative stress induced by reactive oxygen species (ROS)  
14 [18]. Oxidative damages such as DNA modification, secretion of inflammatory cytokines and  
15 lipid peroxidation, etc. are usually caused by ROS [19]. Physiological defenses against these  
16 have been shown by a series of enzymatic and non-enzymatic antioxidants by inactivating free  
17 radical [20, 21]. Natural antioxidants like vitamins A and E are considered to be vital free radical  
18 eliminator due to their lipophilic nature since synthetic antioxidants may have some detrimental  
19 effects on our body [22,23,24,25]. Conversely, MDA is the end product of lipid peroxidation,  
20 which serves as a marker for the oxidative status of the biological system and worth measuring  
21 [26].

22 Immunoglobulins are protein macro-molecules produced by blood cells and neutralize various  
23 pathogenic bacteria and viruses [27]. Although, a direct correlation with immunoglobulins and

1 skin diseases is yet to be determined; the relationship between immunodeficiency and SD has  
2 been reported by several studies, where SD is found to have distinct clinical and histological  
3 features in patients suffering from immunodeficiency virus infection [28-30]. Particularly, the  
4 serum Immunoglobulin E (IgE) level is found to be strongly associated with atopic dermatitis  
5 [31].

6 Unfortunately, the knowledge related to the altered serum levels of these parameters in SD is  
7 deficient; particularly no such work has yet been done in Bangladesh. Thus, the present study  
8 aimed to investigate the serum levels of TEs, MMs, antioxidant vitamins, MDA, and  
9 immunoglobulins in SD patients and corresponding healthy controls (HCs) to explore the  
10 possible pathogenic cause.

## 11 **Methods**

### 12 *Study population*

13 A total of 151 subjects, 75 SD patients, and 76 HCs were recruited for this case-control study.  
14 Patients were recruited from the Department of Dermatology and Venereology, Ad-din Medical  
15 College Hospital, Dhaka, Bangladesh. Age and gender-matched (1:1) HCs were taken from  
16 different areas of Dhaka city. The subjects who had been treated with any antioxidants that could  
17 interfere with the concentrations of trace elements or macro-minerals were excluded from this  
18 investigation. Subjects having a previous history of skin disease or pro-inflammatory diseases  
19 were also excluded from HCs. Furthermore, the socio-demographic profile of the participants  
20 was recorded by using a pre-designed questionnaire. Different biophysical characteristics such as  
21 weight, height, and body mass index (BMI) were also analyzed for the study subjects. All  
22 procedures were conducted following the principles of the Declaration of Helsinki and later  
23 amendments [32].

### 1 *Blood collection and preparation*

2 Five-milliliter of the blood sample was collected from the cephalic vein from each participant  
3 after an overnight fast. The collected blood samples were then transferred into a metal-free, pre-  
4 cleaned test-tube. The samples were permitted to clot for one hour at room temperature (25 °C).  
5 Serum samples were extracted from the blood samples by centrifugation at 3000 rpm for 15  
6 minutes and placed into micro-tubes. The separated serum samples were stored at -80 °C until  
7 further analysis. Sample collection and preservation was performed according to our previous  
8 studies [33].

### 9 *Chemicals and reagents*

10 We purchased standard Cu, Fe, Mn, Zn, Ca, and Mg from Buck Scientific, USA. The  
11 immunoglobulin kit was purchased from Chronolab, Switzerland. Standard  $\alpha$ -tocopherol  
12 (vitamin E),  $\alpha$ -tocopheryl acetate, and retinol (vitamin A) were supplied by Sigma Chemical Co.,  
13 USA. For HPLC-based analysis, Active Fine Chemicals Limited, Dhaka, Bangladesh supplied  
14 HPLC grade chemicals and reagents. Other supportive chemicals of the recommended grade  
15 were purchased from Merck, Germany.

### 16 *Determination of serum trace elements and macro-minerals*

17 Flame atomic absorption spectrometry (FAAS) and graphite furnace atomic absorption  
18 spectrometry (GFAAS) were used to quantify serum TEs (Zn, Cu, Mn, and Fe) and MMs (Ca  
19 and Mg). Briefly, serum samples were diluted with de-ionized water 1:10 dilution. For the  
20 calibration curve, different concentrations (0.5, 1.0, 2.0, 5.0 and 10.0 mg/L) of TEs and MMs  
21 were used. Finally, the concentrations of TEs and MMs were measured at 422.7, 285.2, 327.4,  
22 248.3, 279.8, and 213.9 nm for Ca, Mg, Cu, Fe, Mn, and Zn, respectively. Standard solutions

1 were run for every 10 test samples to ensure assay accuracy and quality [34]. Enough precaution  
2 was taken during the handling of serum samples to avoid or minimize the contamination.

### 3 *Measurement of serum antioxidant vitamins*

4 Vitamin A and E were determined from serum samples by liquid-liquid extraction using n-  
5 hexane and dried by evaporation using a sample concentrator (DB-3, Techne, UK) at 40°C under  
6 a stream of nitrogen. Afterward, the dried extract was reconstituted in the mobile phase. The  
7 serum concentrations of vitamin A and E were measured simultaneously at 291nm by the  
8 modified RP-HPLC method with UV detection [35].

### 9 *Quantification of serum malondialdehyde*

10 The concentration of serum malondialdehyde (MDA) was quantified using thiobarbituric acid  
11 (TBA) reagent and the absorbance of the supernatant was measured spectrophotometrically at  
12 530 nm. MDA was measured in terms of TBARS by the modified method described in our past  
13 study [33]. The concentration of MDA was expressed as nmol/mL.

### 14 *Serum Immunoglobulin profiling*

15 Serum immunoglobulins were estimated by the quantitative turbidimetric method using an  
16 immunoglobulin kit. In this method samples containing IgA, IgG, IgM were mixed with the  
17 activation buffer and then with anti-human immunoglobulin reagent according to the procedure  
18 described in our previous article [36]. Briefly, the serum samples were diluted to 1:4 dilution  
19 with saline water. The diluted serum sample was pipetted into a microtitre plate. For calibration  
20 curves, separate microtitre plates were used for each of the immunoglobulins (IgA, IgG, IgM).  
21 10 µL, 25 µL, 50 µL, 75 µL and 100 µL of the calibrator protein were also pipetted into marked  
22 wells. 230 µL of reagent R1 (tris-buffer) was added to each serum and calibrator protein-  
23 containing well of the microtitre plate to make the total volume of 240 µL. Then 15 µL diluted

1 respective anti-human IgA, IgG, and IgM (1:1:1 diluted with saline water) were added to the  
2 respective wells and incubated for 2-5 minutes to react with anti-human immunoglobulin with  
3 the test serum and calibrator protein. After proper mixing absorbance was taken at 630 nm for  
4 IgA and IgG and 405 nm for IgM, respectively.

#### 5 *Statistical Analysis*

6 All the data were presented as mean  $\pm$  standard error mean (mean  $\pm$  SEM). Pearson's correlation  
7 analysis was applied to obtain the correlation among various study parameters. A comparison of  
8 all parameters between SD patients and HCs was performed by the independent sample t-tests,  
9 Pearson's correlation test, and box plot graphs. In all cases, a p-value of less than 0.05 was  
10 considered as statistically significant. All the statistical analysis was done using the statistical  
11 software package SPSS version 25.0 (Armonk, NY: IBM Corp.).

## 12 **Results**

### 13 *Anthropometric and demographic profile of the study population*

14 The anthropometric and demographic characteristics of the SD patients and HCs are presented in  
15 [Table 1](#). Where the male comprised the highest percentage for both groups. Though SD  
16 initiates at any point of age, our present study was carried out over the patients and HCs with an  
17 average age of 18-35 years. There was no significant difference in the mean value of age and  
18 BMI between the SD patients and HCs.

### 19 *Serum trace elements, macro-minerals, antioxidant vitamins, MDA and immunoglobulins levels*

20 Serum levels of TEs, MMs, antioxidant vitamins, MDA, and immunoglobulins are shown in  
21 [Table 2](#). The concentrations of Cu, Mn, Fe, Ca, and Mg were found significantly increased in the  
22 SD patients compared with the HCs. Also, serum MDA levels were found significantly elevated  
23 in the SD patients compared to HCs. However, serum levels of vitamin E along with three



1 immunoglobulins (IgA, IgG, and IgM) were observed significantly lower in SD patients  
2 compared to HCs. The distribution pattern of different TEs, MMs, antioxidant vitamins, MDA,  
3 and immunoglobulins are presented by Fig. 1 and Fig.2.

4 The inter-element relationships of the tested elements between SD patients and HCs were  
5 analyzed by Pearson's correlation test and presented in Table 3. From correlation study, we  
6 found a significant positive correlation between Zn and Ca ( $r = 0.365$ ,  $p = 0.009$ ) in SD patients.  
7 Also, serum Ca and Mg levels are observed positively correlated with each other ( $r = 0.783$ ,  $p =$   
8  $0.001$ ) in HCs. However, a significant negative correlation was detected between serum levels  
9 of Cu and Ca ( $r = -0.298$ ,  $p = 0.035$ ) in SD patients but no such relation was seen in HCs.

## 10 Discussion

11 Analysis of serum trace elements indicated that the serum concentration of Cu, Mn, Fe, Ca, and  
12 Mg was increased significantly in SD patients compared to HCs. The role of Zn in SD is obscure  
13 since no significant change was found, which is supported by the previous study [21]. Mn is  
14 involved in cell differentiation and proliferation; an over-expression of manganese superoxide  
15 dismutase enzyme may involve in malignant melanoma [37, 38]. Mn concentrations in serum  
16 may catalyze the conversion of  $H_2O_2$  to potent hydroxyl radical which could lead to oxidative  
17 damage [13] which merely represents an epiphenomenon related to the pathogenesis of SD.  
18 Excess amount of Fe was observed in SD patients which might be responsible for inducing free  
19 radical-mediated oxidative damage [39]. Ca is also important for the activation of different  
20 enzymes, formation of bone, blood clotting system, and neuromuscular excitability [4, 40]. We  
21 found the significantly higher levels of Ca in SD patients, whereas one study has confirmed that  
22 the elevated serum levels of two calcium-binding proteins are associated with abnormal  
23 keratinocyte differentiation in psoriasis [8]. As a MM, Ca forms the action of the second

1 messenger and regulates keratinocyte proliferation and differentiation [41, 42]. The immune  
2 response can be altered from several aspects by Cu deficiency or high intakes over longer  
3 periods [43, 44]. The present study results along with the previous findings suggest that  
4 increased levels of Cu, Mn, Fe, Ca, and Mn may lead to the imbalance in elemental homeostasis  
5 which may cause oxidative damage to biomolecules in the skin. Moreover, we have found some  
6 significant inter-element relationships in SD patients. According to the present study results, in  
7 SD patients, serum Ca levels are positively influenced by the serum levels of Zn whereas serum  
8 Ca levels are negatively influenced by the serum Cu levels.

9 Antioxidant vitamins are considered to be important factors for maintaining the balance between  
10 ROS production and elimination [45]. Although ROS is produced essentially in biological  
11 processes, it is harmful to the body as it causes cell damage by a free radical chain reaction.  
12 Antioxidants inhibit and scavenge free radicals and thereby counteract their effects [7, 46]. The  
13 present study showed significantly higher levels of MDA and lower levels of vitamin E, though  
14 the changes in vitamin A levels were not significant in SD patients compared to HCs. These  
15 results specify cell and tissue damage due to oxidative stress by binding of free radicals with  
16 membrane lipids, DNA, and other intracellular components. Our study results are supported by a  
17 previous study where significantly lower levels of vitamin E were reported in SD patients  
18 compared to HCs [47]. In the scalp, SD patients reported significantly higher levels of MDA  
19 when compared to HCs [4]. According to the present findings and previous observations, it  
20 implies that elevated MDA and decreased antioxidant vitamin levels may serve as a possible  
21 causative factor for the development of SD.

22 The prevalence of SD is higher (83%) among the population who undergone organ  
23 transplantation, who has AIDS, chronic alcoholic pancreatitis, and various malignancies [48].

1 This observation suggests that the immune system is important for the pathogenesis of SD. The  
2 present investigation observed the significantly decreased levels of serum IgA, IgG, and IgM in  
3 SD patients compared to HCs. Some previous studies were also reported similar observations  
4 [28, 49]. Moreover, SD has been observed more commonly in immunosuppressed patients [48].  
5 From the above discussion, we can say that any alterations in cellular TEs, MMs, antioxidant  
6 vitamins, MDA, and immunoglobulins have unfavorable functional consequences on the immune  
7 system. Therefore, changes in these parameters in serum levels potentially linked with the  
8 etiology of SD.

9 The present study has some limitations. We did not investigate inflammatory, pro-  
10 inflammatory, and anti-inflammatory serum cytokines. ROS can cause different types of  
11 oxidative damages and enhance the secretion of these cytokines in SD. Additionally, it would be  
12 better if we could measure the levels of analyzed parameters after remission of SD to produce a  
13 more valued conclusion. Thus, future investigations in a similar field overcoming the above  
14 issues are suggested for a better understanding of the pathophysiology of SD. Despite these  
15 drawbacks, it is expected that this work will play an important role to develop new  
16 pathological tools for the proper diagnosis and management of SD patients.

## 17 **Conclusion**

18 The present study suggests the possible correlations of altered serum TEs, MMs, MDA,  
19 antioxidant vitamins, and immunoglobulins with the pathophysiology of SD. These findings may  
20 assist in the understanding of the biochemical basis and etiopathological mechanisms of SD.  
21 Moreover, macro and micronutrients, immunoglobulins, and multivitamins would assist the  
22 clinical management of SD patients. The alterations of these parameters in SD patients may be  
23 the consequence, and not the cause, of disease. However, further detailed and more

1 comprehensive studies designed on a longitudinal basis are needed to discover exactly whether  
2 the altered parameters are the cause or consequence of the disease process in SD.

### 3 **Abbreviations**

4 AAD: American Academy of Dermatology; BMI: Body mass index; BMI: Body mass index;  
5 BSMRAU: Bangabandhu Sheikh Mujibur Rahman Agricultural University; CED: Chronic  
6 energy deficiency; FAAS: Flame atomic absorption spectroscopy; GFAAS: Graphite furnace  
7 atomic absorption spectrometry; Ig: Immunoglobulin; MDA: Malondialdehyde; MM: Macro-  
8 minerals; ROS: Reactive oxygen species; SD: Seborrheic dermatitis; SEM: Standard error mean;  
9 SOD: Superoxide dismutase; SPSS: Statistical package for the social sciences; TBA:  
10 Thiobarbituric acid; TE: Trace element.

### 11 **Acknowledgment**

12 All the authors are highly grateful to all the staff and members of Ad-din Medical College  
13 Hospital, Dhaka. The authors are also thankful for the laboratory support of the Department of  
14 Soil Science, Faculty of Agriculture, Bangabandhu Sheikh Mujibur Rahman Agricultural  
15 University (BSMRAU), Salna, Gazipur, Bangladesh.

### 16 **Authors' contributions**

17 IJ and MRI Conceived, designed, conducted, and analyzed the experiment, performed  
18 computational analyses, and data editing, wrote, and revised the manuscript. MRI and ZN  
19 Analyzed the experiment, wrote, and revised the manuscript. RA and SMMR Diagnosed and  
20 evaluate the study subjects. AH and MSI Supervised the whole work and gave important  
21 intellectual content in the manuscript. All authors have read and approved the final version of  
22 this manuscript

### 23 **Funding**

1 There was no funding to conduct this study.

2 **Availability of data and materials**

3 Data supporting our findings are available from the corresponding author on reasonable request.

4 **Ethics approval and consent to participate**

5 The study protocol was approved by the ethical review committee of the department of  
6 dermatology and venereology, Ad-din Medical College Hospital, Dhaka, Bangladesh. All the  
7 participants were well informed about the purpose of the study and written consent was obtained  
8 from each of them to participate.

9 **Consent for publication**

10 Not applicable. `

11 **Competing interests**

12 The authors declare that they have no competing interests.

13 **Author details**

14 <sup>1</sup>Department of Clinical Pharmacy and Pharmacology, Faculty of Pharmacy, University of  
15 Dhaka, Dhaka-1000, Bangladesh

16 <sup>2</sup>Department of Pharmacy, University of Asia Pacific, 74/A, Green Road, Dhaka - 1215,  
17 Bangladesh

18 <sup>3</sup>Apollo Hospitals Dhaka, Bashundhara R/A, Dhaka 1229, Bangladesh

19 <sup>4</sup>Department of Dermatology and Venereology, Ad-din Women's Medical College Hospital, 2  
20 Bara Maghbazar Outer Circular Road, Dhaka 1217, Bangladesh

21

22

23

**Figure legends**

1  
2  
3  
4  
5  
6  
7  
8  
9  
10  
11  
12  
13  
14  
15  
16  
17  
18  
19  
20  
21  
22  
23

**Fig. 1** The changes of serum trace elements and macro-minerals (mg/L) levels in the study population. Graphs showing the median, maximum, and minimum value range. **a** Zinc, **b** Copper, **c** Manganese, **d** Iron, **e** Calcium, **f** Magnesium.

**Fig. 2** The changes in serum levels of antioxidant vitamins ( $\mu\text{mol/L}$ ), MDA ( $\mu\text{mol/L}$ ), and immunoglobulins (mg/dL) levels in the study population. Graphs showing the median, maximum, and minimum value range. **a** Vitamin A, **b** Vitamin E, **c** MDA, **d** Immunoglobulin A, **e** Immunoglobulin G, **f** Immunoglobulin M.

1 **Table 1** Anthropometric and demographic profile of the study population

| Characteristics          | SD patients (n = 75) | Healthy controls (n = 76) | <i>p</i> value |
|--------------------------|----------------------|---------------------------|----------------|
|                          | Mean ± SEM           | Mean ± SEM                |                |
| Age (years)              | 27.13 ± 1.61         | 26.30 ± 0.92              | 0.289          |
| BMI (kg/m <sup>2</sup> ) | 22.65 ± 1.57         | 22.93 ± 1.31              | 0.432          |
| Sex                      | Value, n (%)         |                           |                |
| Male                     | 43 (57.33%)          | 41 (54.67%)               |                |
| Female                   | 32 (42.67%)          | 34 (45.33%)               |                |

2 *p* is significant at the 0.05 level.

3 SD seborrheic dermatitis, SEM standard error mean.

4

5

6

7

8

9

10

11

12

13

14

15

16

1 **Table 2** Serum levels of trace elements, macro-minerals, antioxidant vitamins, malondialdehyde  
 2 and immunoglobulins in the study population

| Parameters               | SD patients (n = 75)<br>Mean $\pm$ SEM | Healthy controls (n = 76)<br>Mean $\pm$ SEM | <i>p</i> value |
|--------------------------|----------------------------------------|---------------------------------------------|----------------|
| Zinc (mg/L)              | 1.430 $\pm$ 0.11                       | 1.308 $\pm$ 0.09                            | 0.289          |
| Copper (mg/L)            | 2.136 $\pm$ 0.10                       | 0.950 $\pm$ 0.05                            | < 0.001*       |
| Manganese (mg/L)         | 15.830 $\pm$ 0.85                      | 7.022 $\pm$ 0.46                            | < 0.001*       |
| Iron (mg/L)              | 2.248 $\pm$ 0.14                       | 1.130 $\pm$ 0.11                            | < 0.001*       |
| Calcium (mg/L)           | 185.040 $\pm$ 5.89                     | 99.580 $\pm$ 1.77                           | 0.001*         |
| Magnesium (mg/L)         | 29.640 $\pm$ 0.55                      | 20.640 $\pm$ 0.27                           | < 0.001*       |
| Vitamin A ( $\mu$ mol/L) | 0.403 $\pm$ 0.07                       | 0.374 $\pm$ 0.03                            | 0.707          |
| Vitamin E ( $\mu$ mol/L) | 5.564 $\pm$ 0.39                       | 7.074 $\pm$ 0.37                            | 0.009*         |
| MDA ( $\mu$ mol/L)       | 0.2125 $\pm$ 0.31                      | 0.186 $\pm$ 0.28                            | 0.011*         |
| IgA (mg/dL)              | 212.96 $\pm$ 16.38                     | 263.08 $\pm$ 10.22                          | 0.001*         |
| IgG (mg/dL)              | 1208 $\pm$ 16.37                       | 2317 $\pm$ 10.23                            | < 0.001*       |
| IgM (mg/dL)              | 119.45 $\pm$ 8.57                      | 158.89 $\pm$ 9.09                           | 0.003*         |

3 \**p* is significant at the 0.05 level.

4 SD seborrheic dermatitis, SEM standard error mean.

5

6

7



1 **Table 3** Study of inter-element correlations in SD patients and healthy controls

| Correlation parameters | SD patients ( $n = 75$ ) |         | Healthy controls ( $n = 76$ ) |          |
|------------------------|--------------------------|---------|-------------------------------|----------|
|                        | $r$                      | $p$     | $r$                           | $p$      |
| Zn and Cu              | -0.182                   | 0.207   | -0.272                        | 0.056    |
| Zn and Mn              | 0.001                    | 0.996   | 0.003                         | 0.887    |
| Zn and Fe              | 0.222                    | 0.121   | 0.045                         | 0.758    |
| Zn and Ca              | 0.365                    | 0.009** | 0.179                         | 0.213    |
| Zn and Mg              | 0.231                    | 0.107   | -0.127                        | 0.379    |
| Cu and Mn              | 0.092                    | 0.525   | 0.022                         | 0.878    |
| Cu and Fe              | 0.237                    | 0.097   | -0.016                        | 0.914    |
| Cu and Ca              | -0.298                   | 0.035*  | -0.095                        | 0.512    |
| Cu and Mg              | -0.072                   | 0.617   | -0.029                        | 0.842    |
| Mn and Fe              | -0.125                   | 0.385   | 0.005                         | 0.973    |
| Mn and Ca              | -0.127                   | 0.380   | 0.116                         | 0.422    |
| Mn and Mg              | -0.041                   | 0.779   | 0.054                         | 0.708    |
| Ca and Mg              | 0.277                    | 0.052   | 0.783                         | < 0.001* |

2 \* $p$  is significant at the 0.05 level; Negative values indicate the opposite correlation.3  $r$  correlation coefficient,  $p$  significance, SD seborrheic dermatitis.

4

5

6

7

8

**1   References:**

- 2   1. Borda LJ, Wikramanayake TC. Seborrheic Dermatitis and Dandruff: A Comprehensive  
3   Review. *J Clin Investig. Dermatol.* 2015;3(2):1-22.
- 4   2. Gary G. Optimizing treatment approaches in seborrheic dermatitis. *J Clin Aesthet Dermatol.*  
5   2013;6(2):44-9.
- 6   3. Fox BJ, Odom RB. Papulosquamous diseases: A review. *J Am Acad Dermatol.*  
7   1985;12(4):597-624.
- 8   4. Soeprono FF, Schinella RA, Cockerell CJ, Comite SL. Seborrheic-like dermatitis of acquired  
9   immunodeficiency syndrome: A clinicopathologic study. *J Am Acad Dermatol.* 1986;14:242-8.
- 10   5. O'Connor NR, McLaughlin MR, Ham P. Newborn skin: Part I. Common rashes. *Am Fam*  
11   Physician. 2008;77(1):47-52.
- 12   6. Johnson M RJ. Prevalence of dermatological diseases among persons 1-74 years of age.  
13   Washington, DC, US Dep. Heal Hum Serv. 1977;1579-660.
- 14   7. Dursun P, Demirtas E, Bayrak A, Yarali H. Decreased serum paraoxonase 1 (PON1) activity:  
15   An additional risk factor for atherosclerotic heart disease in patients with PCOS. *Hum Reprod.*  
16   2006;21(1):104-8.
- 17   8. Borda LJ, Wikramanayake TC. Seborrheic Dermatitis and Dandruff: A Comprehensive  
18   Review. *J Clin Investig Dermatol.* 2015;3(2):10.13188/2373-1044.1000019.
- 19   9. Ahmed S, Aftabuddin AK. Common skin diseases (analysis of 7,636 cases). *Bangladesh Med*  
20   Res Counc Bull. 1977;3(1):41-45.

- 1 10. Novak MA, Meyer JS. Alopecia: Possible causes and treatments, particularly in captive  
2 nonhuman primates. *Comp Med.* 2009;59(1):18-26.
- 3 11. Özcan M. Mineral contents of some plants used as condiments in Turkey. *Food Chem.*  
4 2004;84(3):437-40.
- 5 12. Soetan KO, Olaiya CO, Oyewole OE. The importance of mineral elements for humans,  
6 domestic animals and plants - A review. *African J Food Sci.* 2010;4(5):200-22.
- 7 13. Kulkarni N, Kalele K, Kulkarni M, Kathariya R. Trace elements in oral health and disease. *J*  
8 *Dent Res Rev.* 2014;1(2):100-4
- 9 14. Shazia Q, Mohammad ZH, Rahman T, Shekhar HU. Correlation of oxidative stress with  
10 serum trace element levels and antioxidant enzyme status in beta thalassemia major patients: A  
11 review of the literature. *Anemia.* 2012;270932.
- 12 15. Prashanth L, Kattapagari K, Chitturi R, Baddam VR, Prasad L, Prashanth L, et al. A review  
13 on role of essential trace elements in health and disease. *J Dr NTR Univ Heal Sci.* 2015;4(2):75-  
14 85.
- 15 16. Toyran M, Kaymak M, Vezir E, Harmanci K, Kaya A, Giniş T, et al. Trace element levels in  
16 children with atopic dermatitis. *J Investig Allergol Clin Immunol.* 2012;22(5):341-4.
- 17 17. Aktaş Karabay E, Aksu Çerman A. Serum zinc levels in seborrheic dermatitis: a case-control  
18 study. *Turk J Med Sci.* 2019;49(5):1503-8.
- 19 18. Amin MN, Liza KF, Sarwar MS, Ahmed J, Adnan MT, Chowdhury MI, et al. Effect of lipid  
20 peroxidation, antioxidants, macro minerals and trace elements on eczema. *Arch Dermatol Res.*  
21 2015;307(7):617-23.

- 1 19. Lobo V, Patil A, Phatak A, Chandra N. Free radicals, antioxidants and functional foods:  
2 Impact on human health. *Pharmacogn Rev.* 2010;4(8):118-26.
- 3 20. Bickers DR, Athar M. Oxidative stress in the pathogenesis of skin disease. *J Invest Dermatol.*  
4 2006;126(12):2565-2275.
- 5 21. Briganti S, Picardo M. Antioxidant activity, lipid peroxidation and skin diseases. What's  
6 new. *J Eur Acad Dermatol Venereol.* 2003;17(6):663-9.
- 7 22. Kaur G, Mishra S, Sehgal A, Prasad R. Alterations in lipid peroxidation and antioxidant  
8 status in pregnancy with preeclampsia. *Mol Cell Biochem.* 2008;313(1-2):37-44.
- 9 23. Godic A, Poljšak B, Adamic M, Dahmane R. The role of antioxidants in skin cancer  
10 prevention and treatment. *Oxid Med Cell Longev.* 2014;860479.
- 11 24. Narendhirakannan RT, Hannah MA. Oxidative stress and skin cancer: an overview. *Indian J*  
12 *Clin Biochem.* 2013;28(2):110-5.
- 13 25. Kurt E, Metintas S, Basyigit I, Bulut I, Coskun E, Dabak S, et al. Prevalence and risk factors  
14 of allergies in turkey (PARFAIT): Results of a multicentre cross-sectional study in adults. *Eur*  
15 *Respir J.* 2009;33(4):724-33.
- 16 26. Polla BS, Ezekowitz RA, Leung DY. Monocytes from patients with atopic dermatitis are  
17 primed for superoxide production. *J Allergy Clin Immunol.* 1992;89(2):545-51.
- 18 27. Janeway CA Jr, Travers P, Walport M, et al. *Immunobiology: The Immune System in*  
19 *Health and Disease.* 5th edition. New York: Garland Science; 2001.

- 1 28. Froschl M, Land HG, Landthaler M. Seborrheic dermatitis and atopic eczema in human  
2 immunodeficiency virus infection. *Semin Dermatol.* 1990;9(3):230-2.
- 3 29. Forrestel AK, Kovarik CL, Mosam A, Gupta D, Maurer TA MR. Diffuse HIV-associated  
4 seborrheic dermatitis - a case series. *Int J STD AIDS.* 2016;27(14):1342-5.
- 5 30. Tull T, Noy M, Ioannou N, Bunker CB, Morar N. Sebopsoriasis in HIV positive patients:  
6 Response to topical calcineurin inhibitors. *Exp Dermatol.* 2014;176(3):813-5.
- 7 31. Amrol D. Anti-Immunoglobulin E in the Treatment of Refractory Atopic Dermatitis. *South*  
8 *Med J.* 2010;103(6):554-88.
- 9 32. Bošnjak S. The Declaration of Helsinki: The cornerstone of research ethics. *Arch Oncol.*  
10 2001;9(3):179-84.
- 11 33. Islam MR, Islam MR, Ahmed I, Moktadir AA, Nahar Z, Islam MS, et al. Elevated serum  
12 levels of malondialdehyde and cortisol are associated with major depressive disorder: A case-  
13 control study. *SAGE Open Med.* 2018;9(6):2050312118773953.
- 14 34. Islam MR, Islam MR, Qusar SMMA, Islam MS, Kabir MH, Rahman GKMM, et al.  
15 Alterations of serum macro-minerals and trace elements are associated with major depressive  
16 disorder: a case-control study. *BMC Psychiatry* 2018;18:94.
- 17 35. Islam MR, Ali S, Karmoker JR, Kadir MF, Ahmed MU, Nahar Z, et al. Evaluation of serum  
18 amino acids and non-enzymatic antioxidants in drug-naïve first-episode major depressive  
19 disorder. *BMC Psychiatry* 2020;20(1):333.
- 20 36. Nasreen W, Kadir MF, Karmoker JR, Islam MR, Islam MR. Profiling of serum  
21 immunoglobulins in bangladeshi major depressive disorder patients. *Health* 2018;10:1185-91.

- 1 37. Schmidt M, Goebeler M, Posern G, Feller SM, Seitz CS, Bröcker EB, et al. Ras-independent  
2 activation of the Raf/MEK/ERK pathway upon calcium-induced differentiation of keratinocytes.  
3 J. Biol. Chem. 2000;275(52):41011-17.
- 4 38. Halevy S, Giryas H, Friger M, Grossman N, Karpas Z, Sarov B, Sukenik S. The role of trace  
5 elements in psoriatic patients undergoing balneotherapy with Dead Sea bath salt. Isr Med Assoc  
6 J. 2001;3(11):828-32.
- 7 39. Oppenheimer SJ. Iron and its relation to immunity and infectious disease. J Nutr.  
8 2001;131(2S-2):616S-633S
- 9 40. Tsukahara H, Shibata R, Ohshima Y, Todoroki Y, Sato S, Ohta N, et al. Oxidative stress and  
10 altered antioxidant defenses in children with acute exacerbation of atopic dermatitis. Life Sci.  
11 2003;72(22):2509-16.
- 12 41. Tu CL, Oda Y, Komuves L, Bikle DD. The role of the calcium-sensing receptor in epidermal  
13 differentiation. Cell Calcium. 2004;35(3):265-73.
- 14 42. Passi S, Morrone A, De Luca C, Picardo M, Ippolito F. Blood levels of vitamin E,  
15 polyunsaturated fatty acids of phospholipids, lipoperoxides and glutathione peroxidase in  
16 patients affected with seborrheic dermatitis. J Dermatol Sci. 1991;2(3):171-8.
- 17 43. Pan Y, Loo G. Effect of copper deficiency on oxidative DNA damage in Jurkat T  
18 lymphocytes. Free Radic Biol Med. 2000 Mar 1;28(5):824-30.
- 19 44. Maggini S, Wintergerst ES, Beveridge S, Hornig DH. Selected vitamins and trace elements  
20 support immune function by strengthening epithelial barriers and cellular and humoral immune  
21 responses. Br J Nutr. 2007 Oct;98 Suppl 1:S29-35.

- 1 45. Uttara B, Singh AV, Zamboni P, Mahajan RT. Oxidative stress and neurodegenerative  
2 diseases: A review of upstream and downstream antioxidant therapeutic options. *Curr*  
3 *Neuropharmacol.* 2009;7(1):65-74.
- 4 46. Lai A Fat RF, van Furth R. Serum immunoglobulin levels in various skin diseases. *Clin Exp*  
5 *Immunol.* 1974;17(1):129-37.
- 6 47. Hinks LJ, Young S CB. Trace element status in eczema and psoriasis. *Clin Exp Dermatol.*  
7 1987;12:93-7.
- 8 48. Dessinioti C, Katsambas A. Seborrheic dermatitis: etiology, risk factors, and treatments: facts  
9 and controversies. *Clin Dermatol.* 2013;31(4):343-51.
- 10 49. Yel L. Selective IgA Deficiency. *J Clin Immunol.* 2010;30(1):10-6.

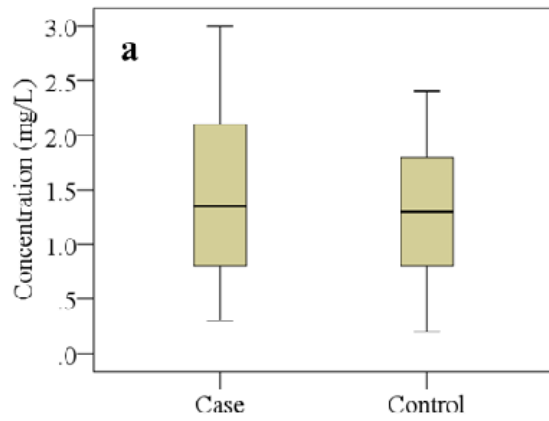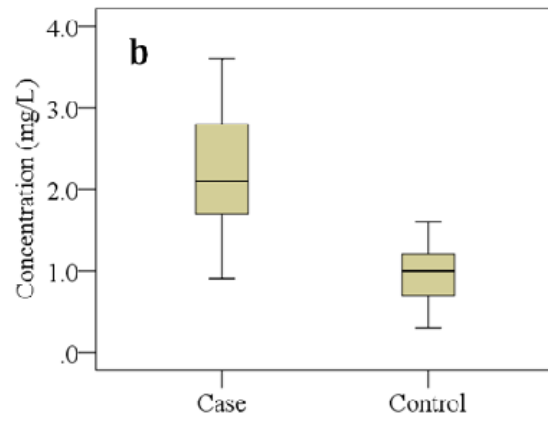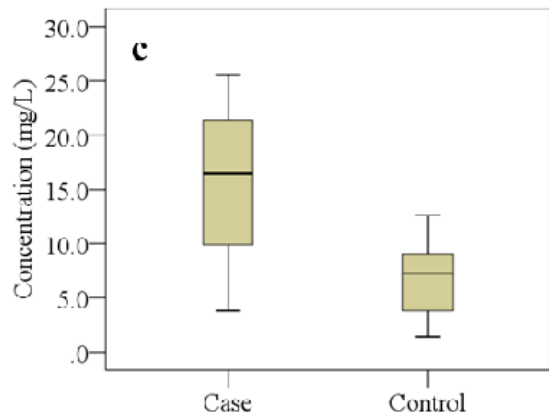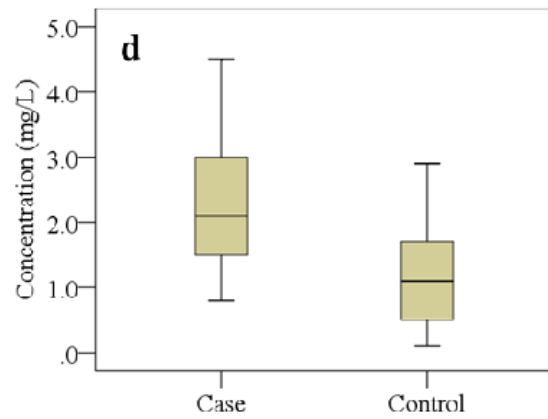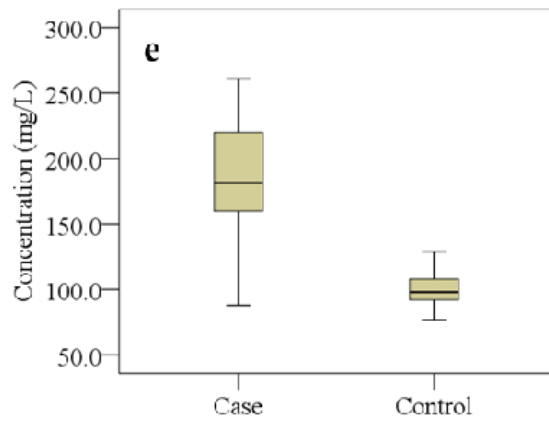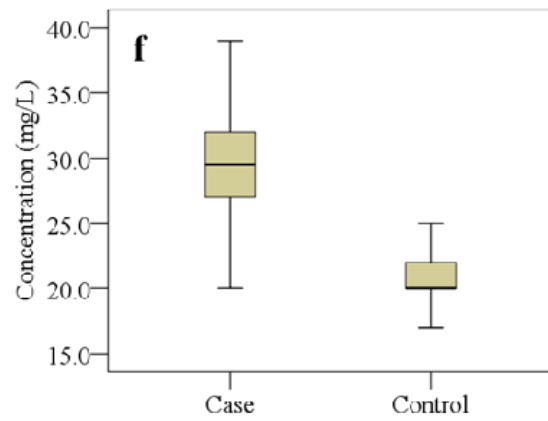



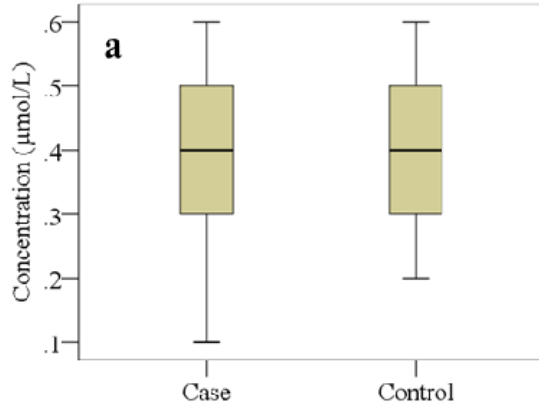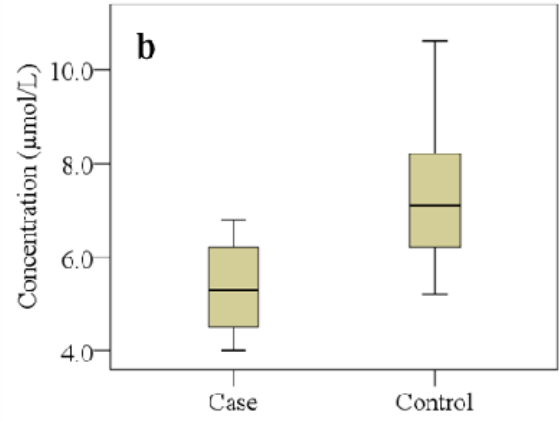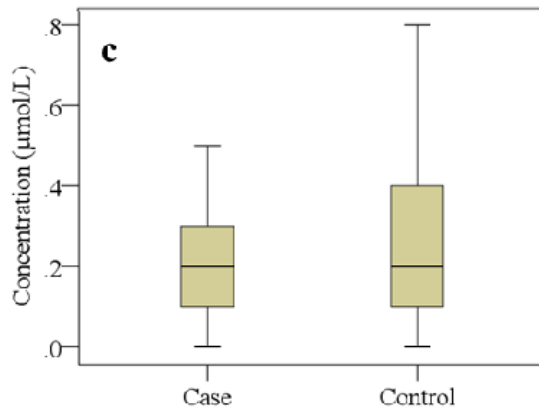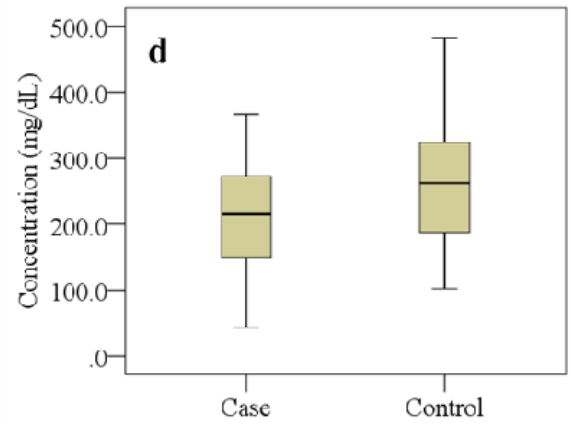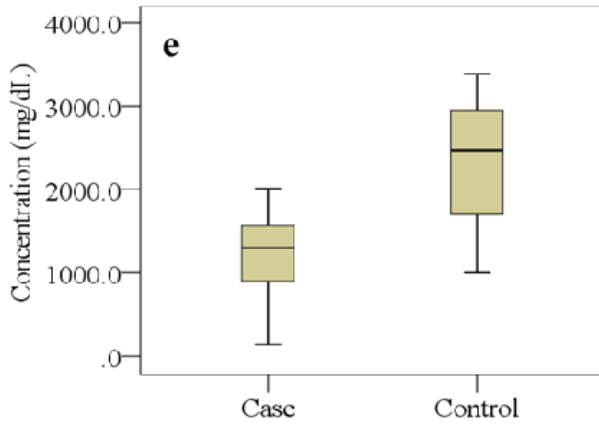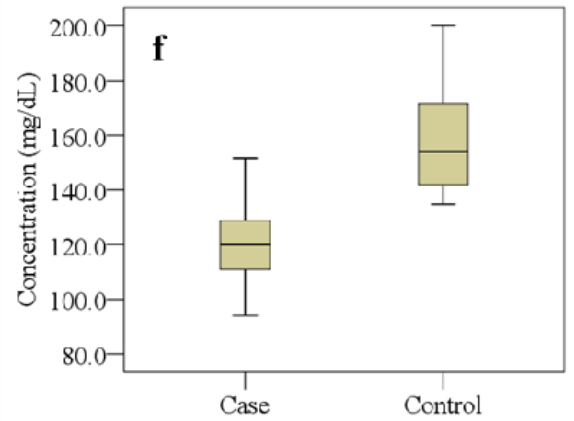

Source: https://www.medrxiv.org/content/10.1101/2020.10.01.20205534.full.pdf
